# Supplementary material for: Aspirin ameliorates the long‐term adverse effects of doxorubicin through suppression of cellular senescence
Source: PubMed Central journal article supplement (PMC6996307; doi:10.1096/fba.2019-00041), 2019-09-09
Supplement: FBA2-1-579-s001.pdf [file FBA2-1-579-s001.pdf]

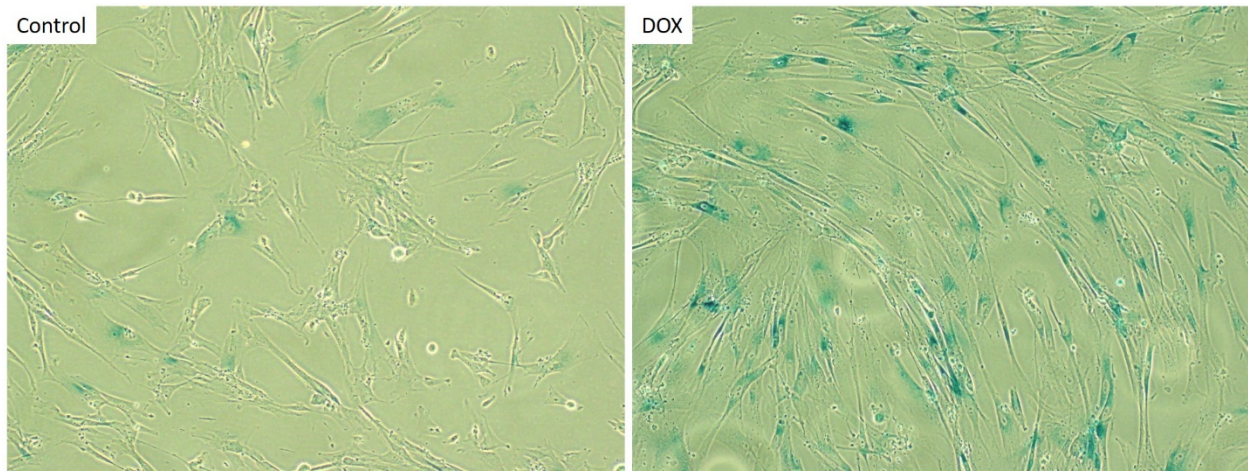

**Supplementary figure** Senescence-associated  $\beta$ -galactosidase staining of fibroblasts in figure 8D. Senescence was induced by incubation with 0.25  $\mu$ M DOX for 24 hours. Senescence-associated  $\beta$ -galactosidase staining was conducted at 72 hours after the induction of senescence.
